# Supplementary material for: Copper(ii) complexes supported by click generated mixed NN, NO, and NS 1,2,3-triazole based ligands and their catalytic activity in azide–alkyne cycloaddition
Source: Royal Society of Chemistry journal article supplement (doi:10.1039/c4dt00323c), 2014-01-01

**Copper(II) complexes supported by click generated mixed *NN*,  
*NO*, and *NS* 1,2,3-triazole based ligands and their catalytic  
activity in azide-alkyne cycloaddition**

Daniel Mendoza-Espinosa,<sup>a</sup> Guillermo Negrón-Silva,<sup>\*a</sup> Deyanira Angeles-Beltran, Alejandro  
Álvarez-Hernández,<sup>b</sup> Oscar R. Suárez-Castillo,<sup>b</sup> Rosa Santillán<sup>c</sup>

Supporting information

Sample <sup>1</sup>H and <sup>13</sup>C NMR spectra for mono-, bis- and tris-1,2,3-Triazoles  
prepared by the CuAAC process

# 1-Benzyl-4-phenoxyethyl-1H-1,2,3-triazole (I)

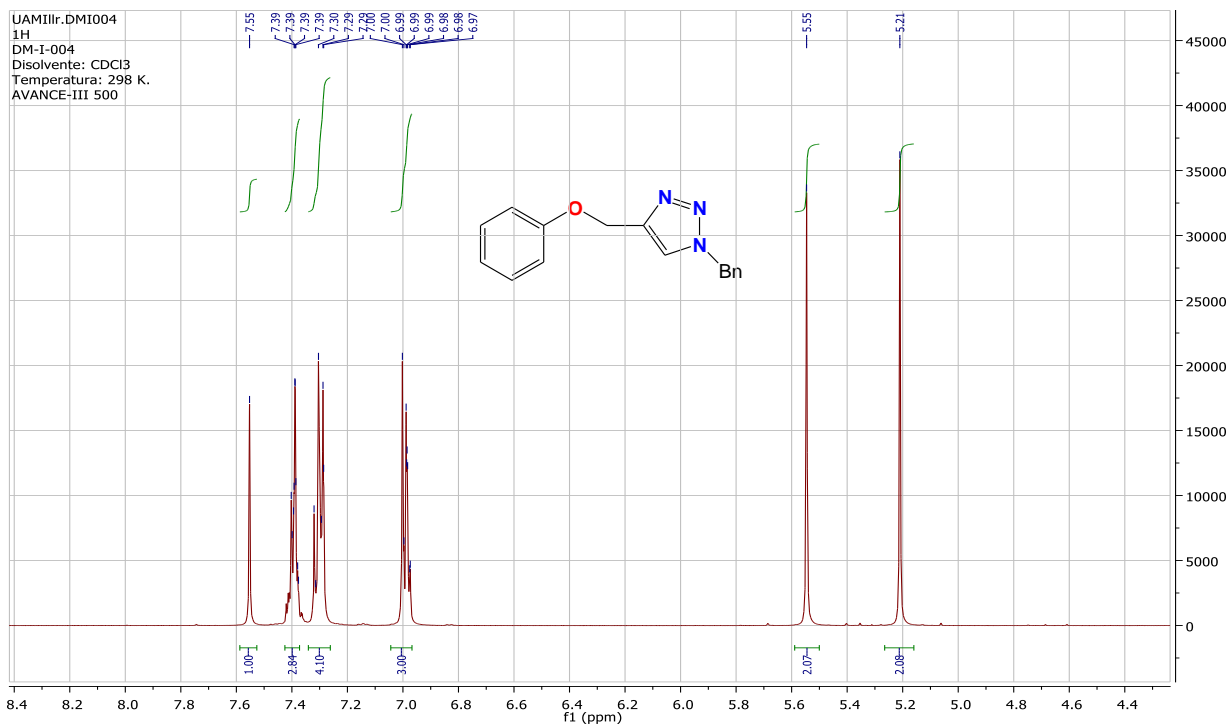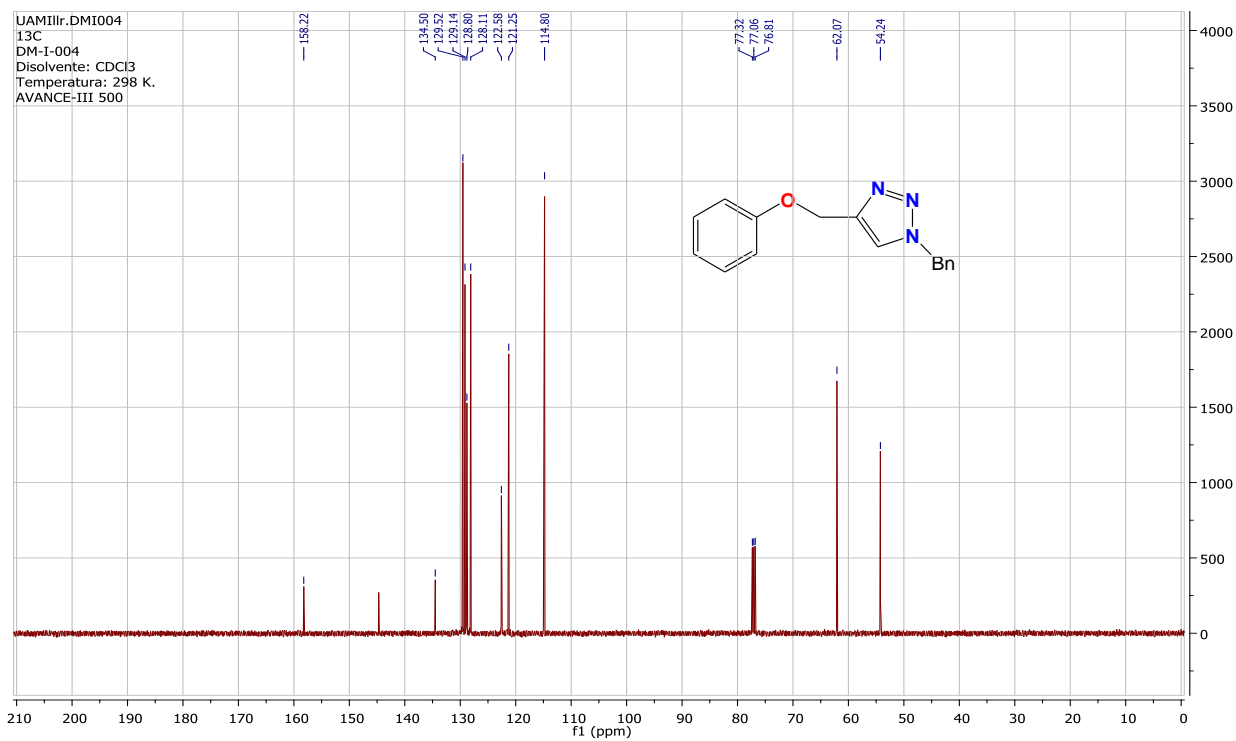

4,4'-[1,3-phenylenebis(oxyethylene)]bis-1-(benzyl)-1*H*-1,2,3-Triazole (II)

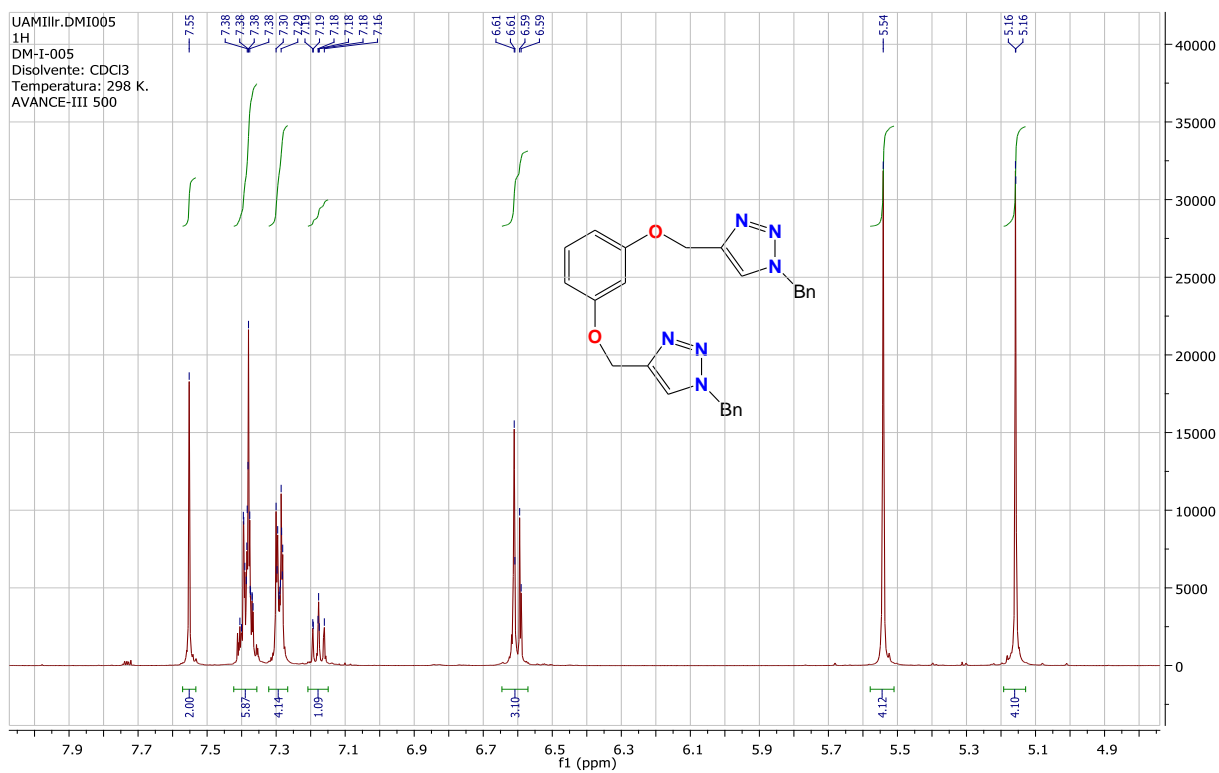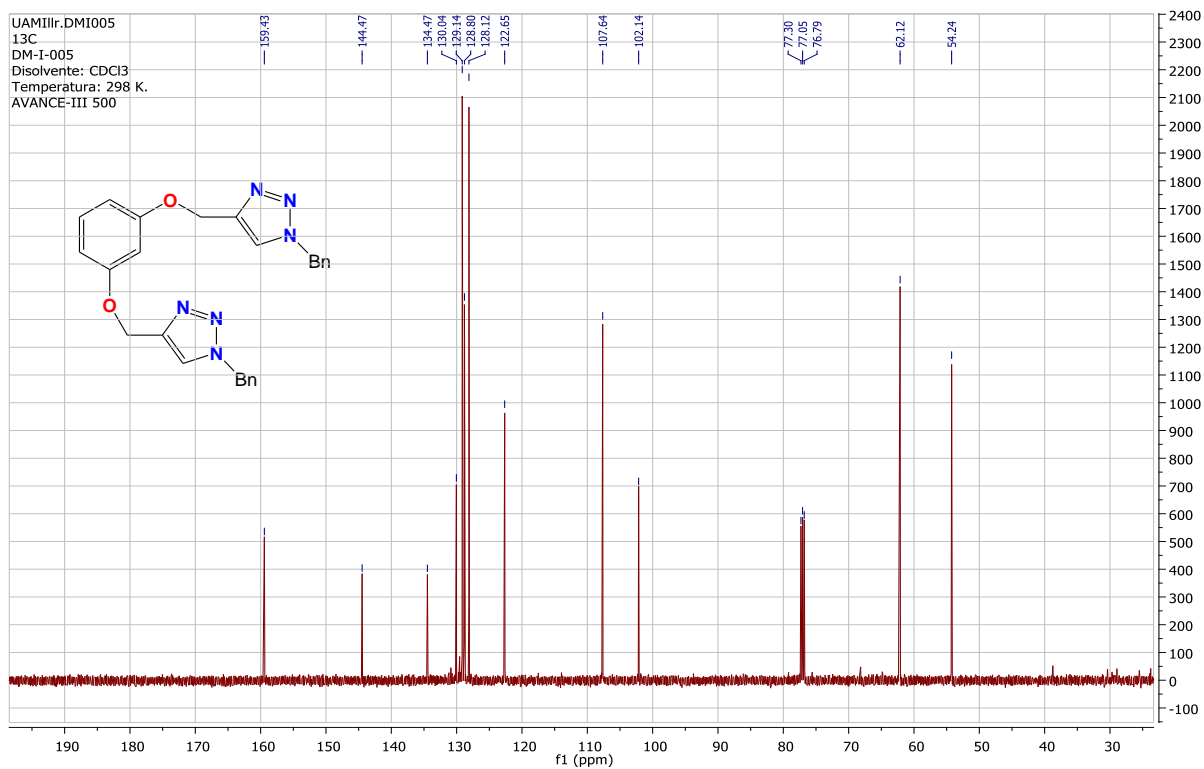

# (1-Benzyl-1*H*-1,2,3-triazole-4-ylmethyl)-methyl-phenyl-amine

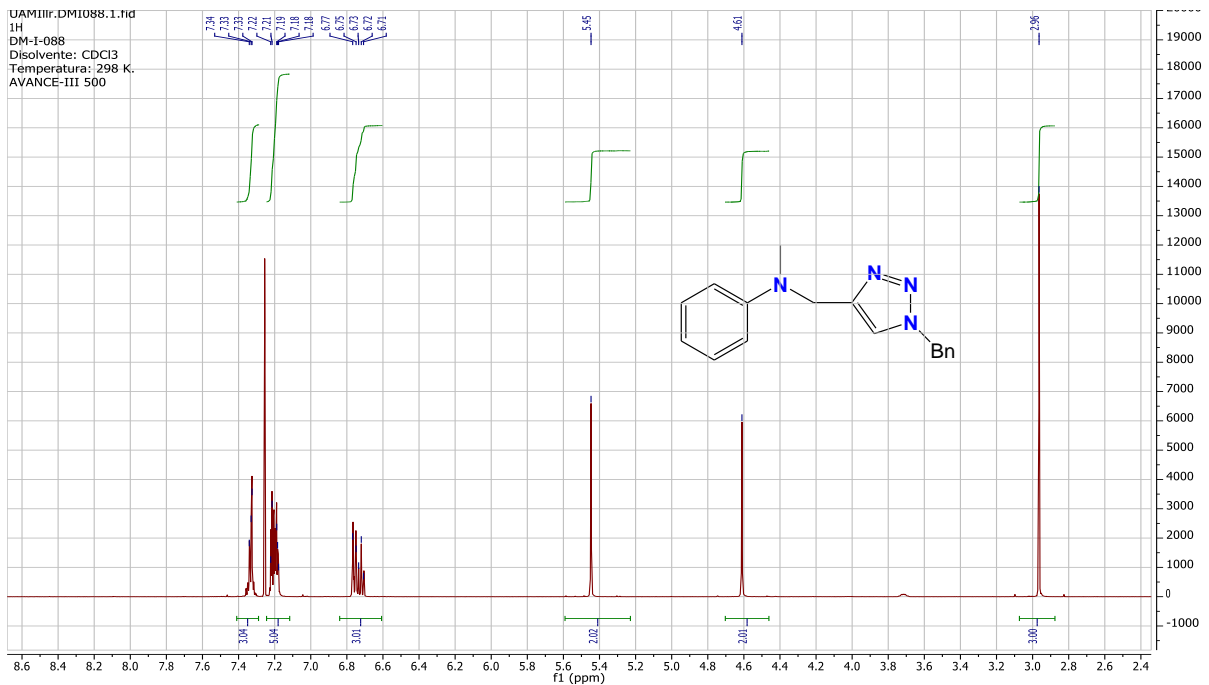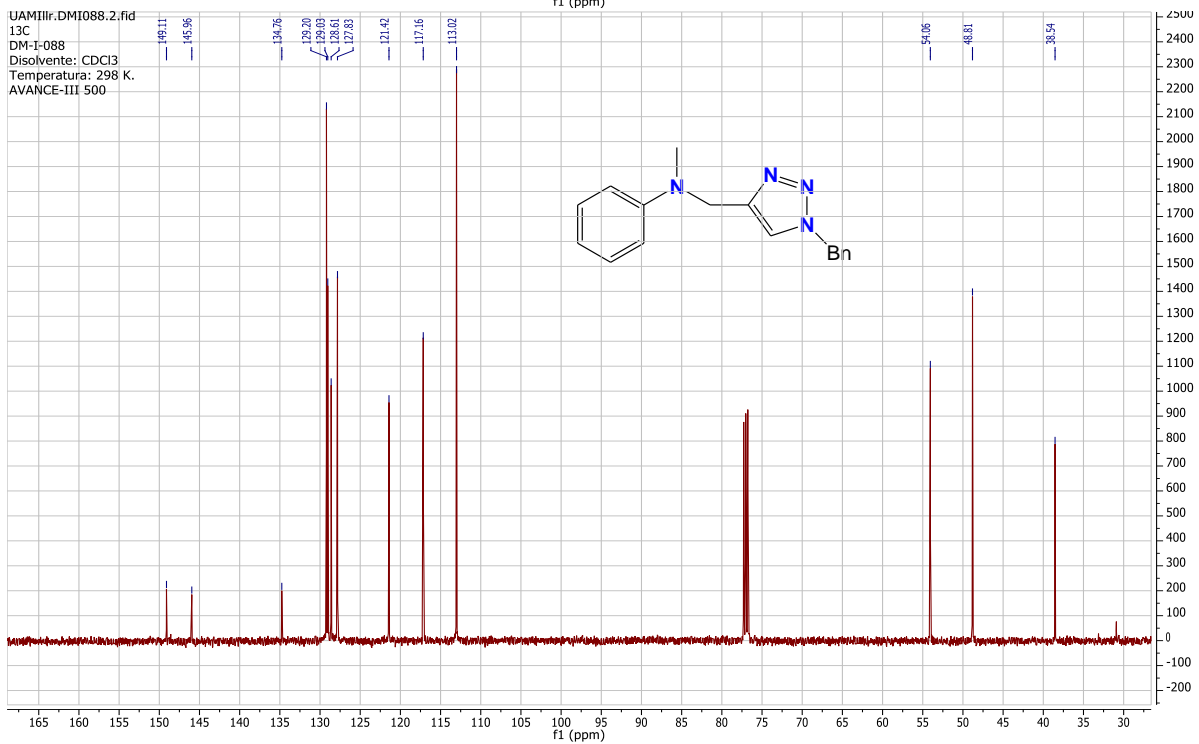

# 1-Benzyl-4-phenylthiomethyl-1H-1,2,3-triazole

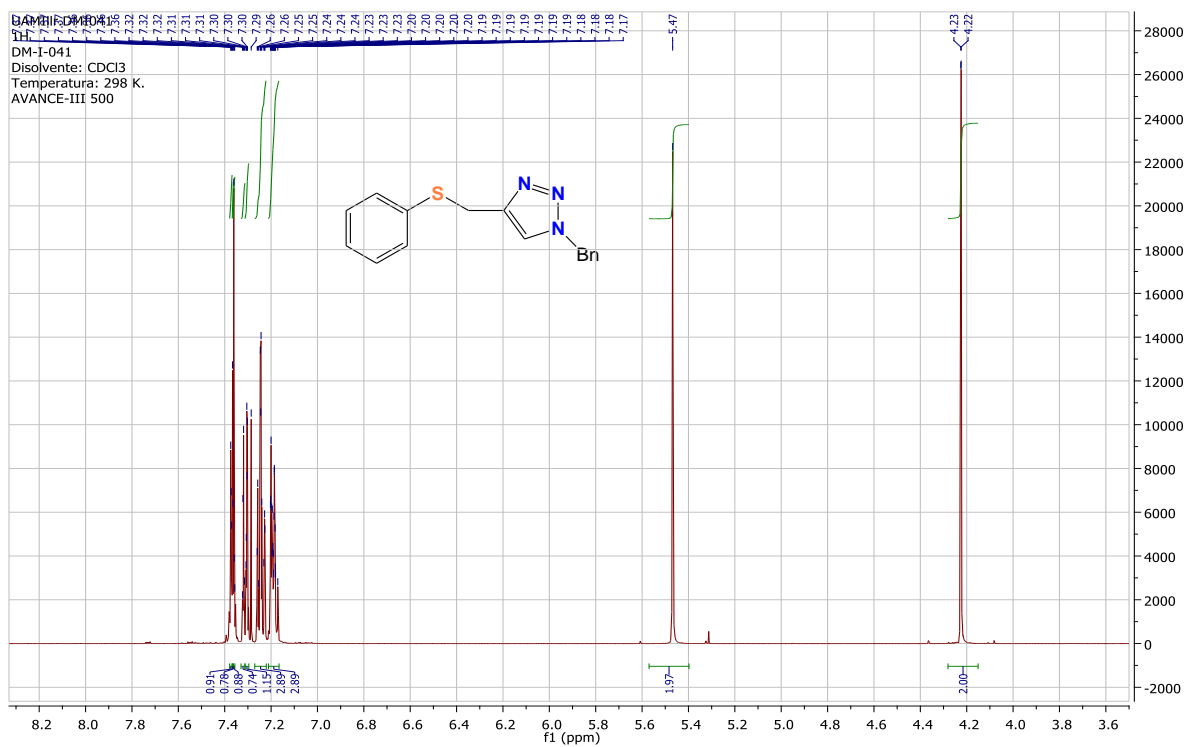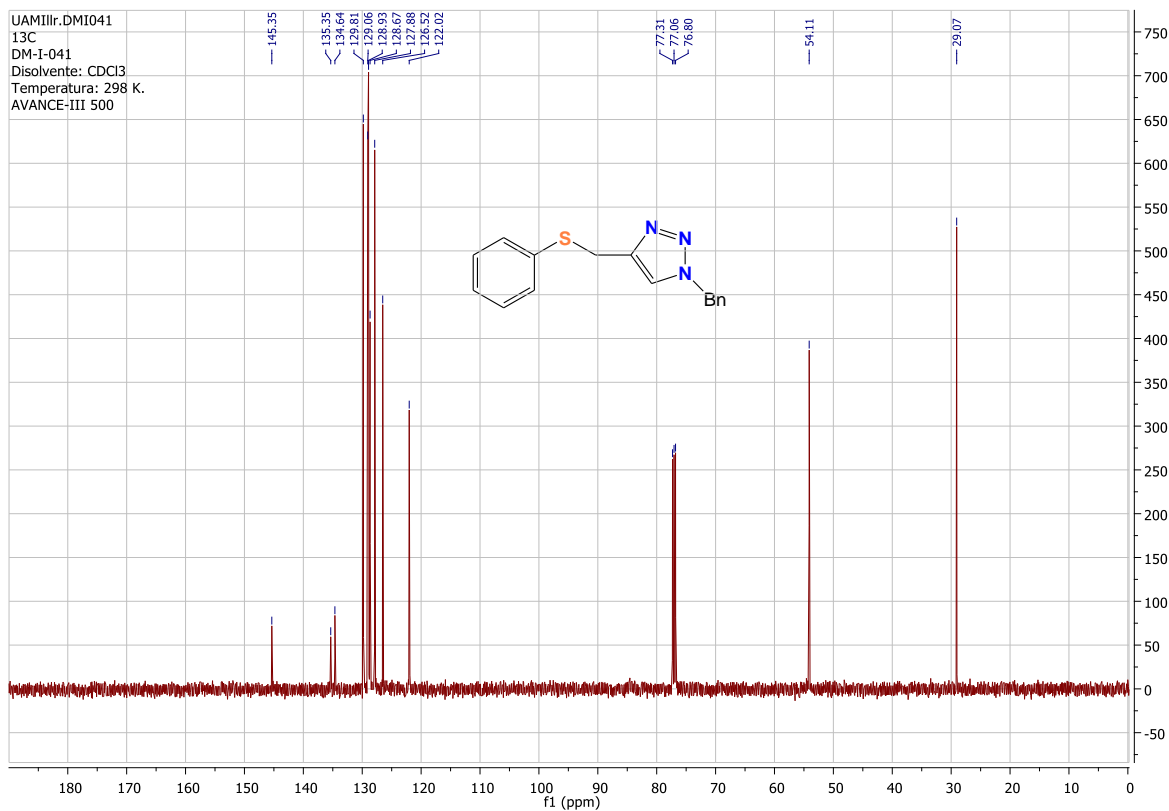

# 4-[phenylmethoxy)methyl]-1-(benzyl)-1H-1,2,3-Triazole

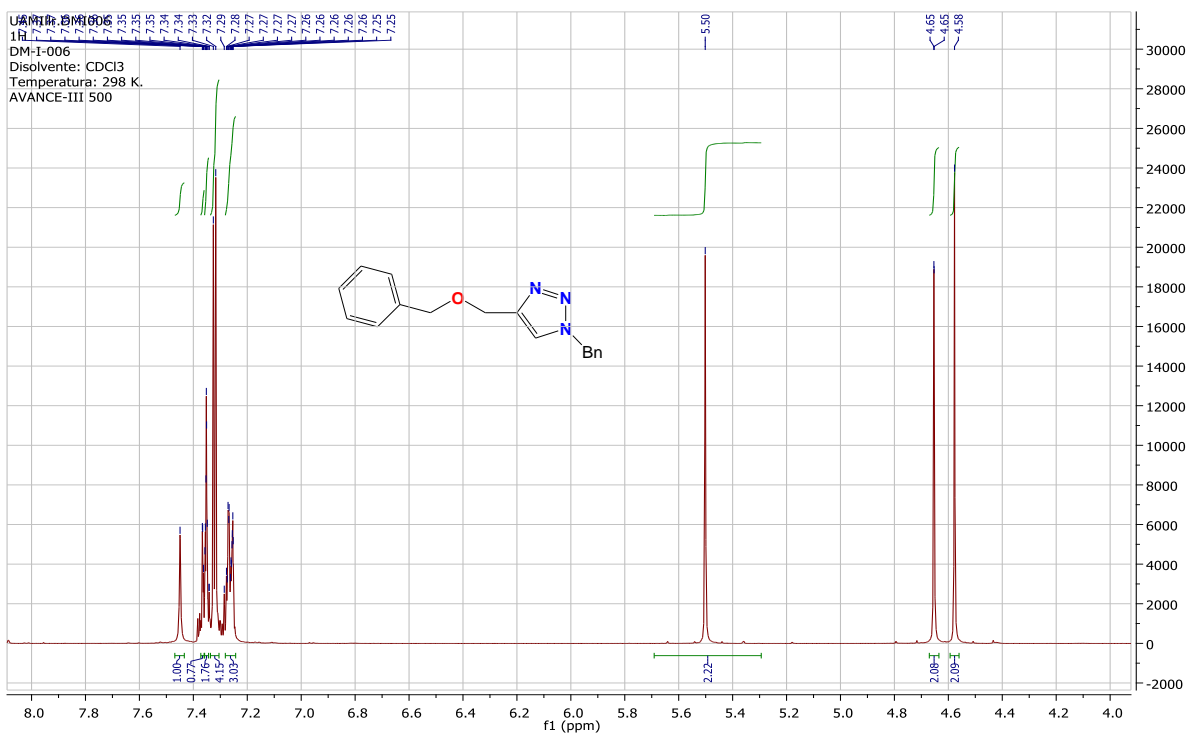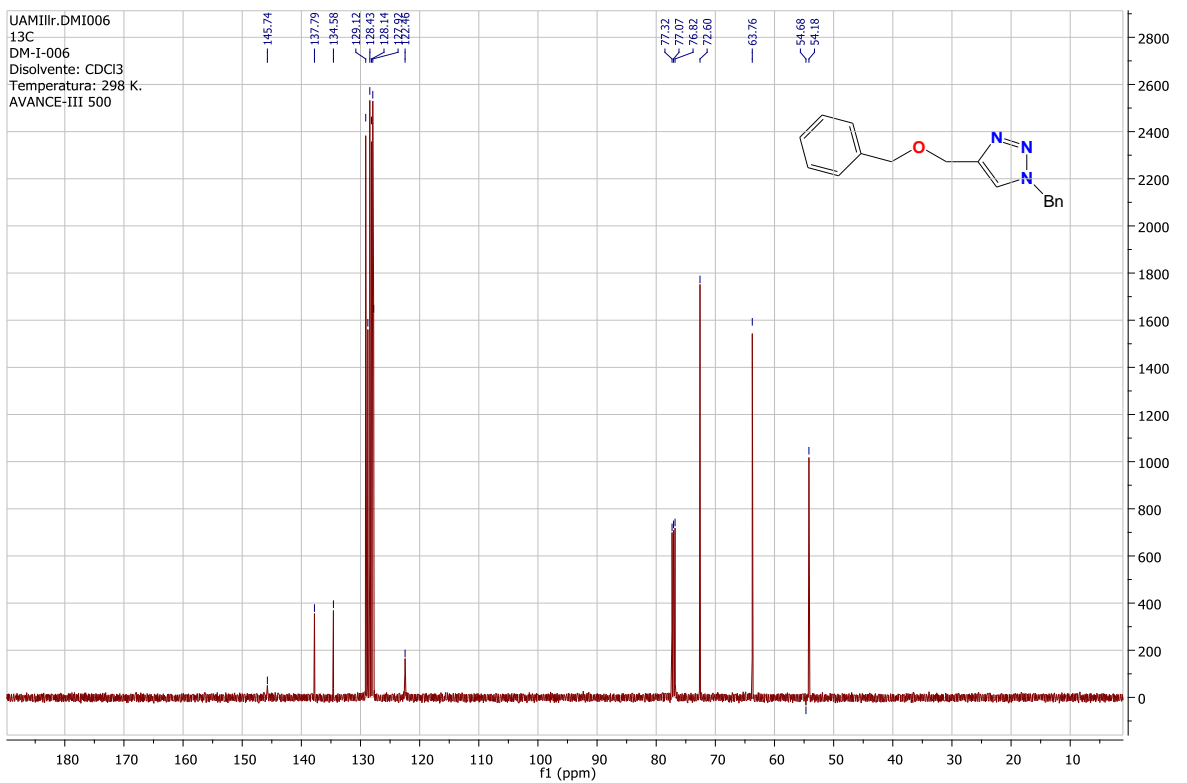

# Bis-(1-benzyl-1*H*-1,2,3-triazole-4-ylmethyl)-phenyl-amine

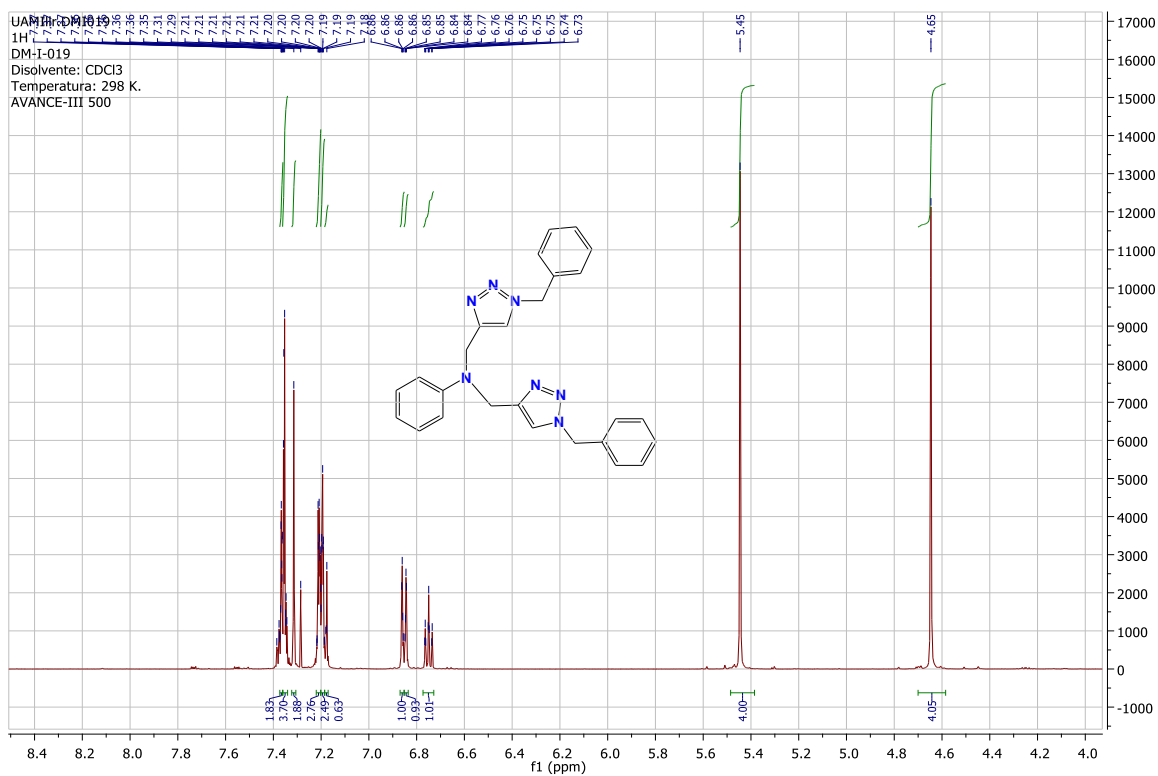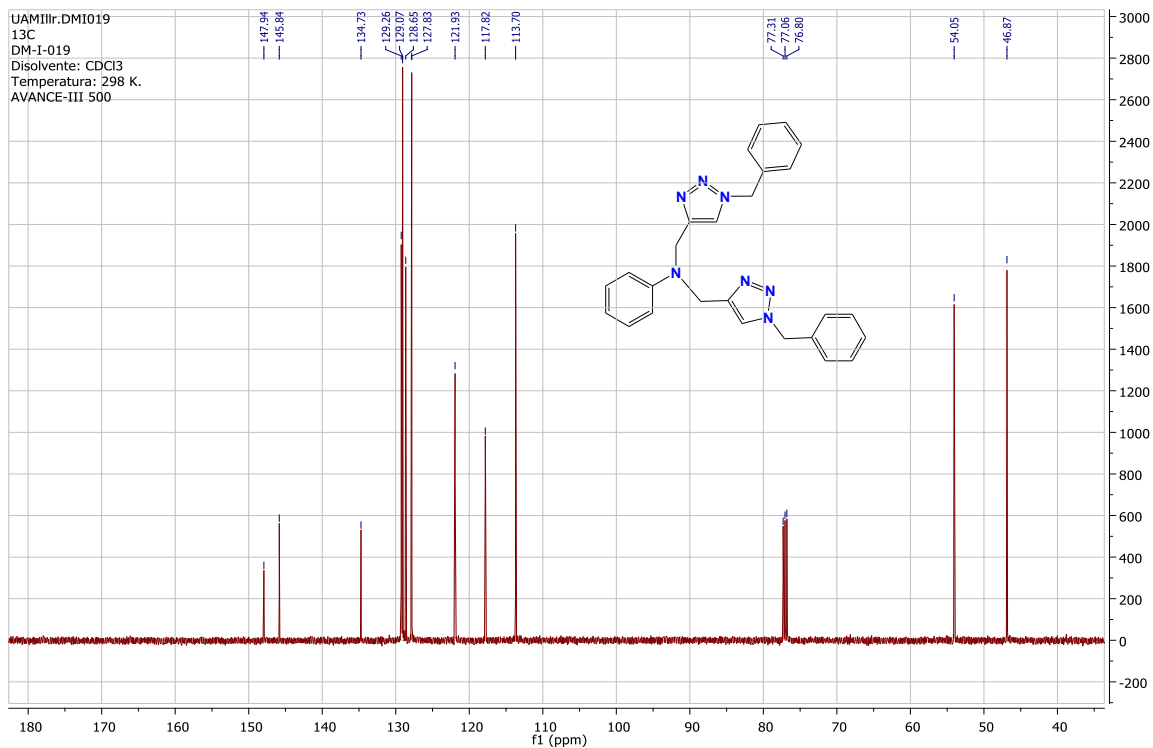

1,3-bis((1-benzyl-1H-1,2,3-triazol-4-yl)methyl)pyrimidine-2,4(1H,3H)-dione

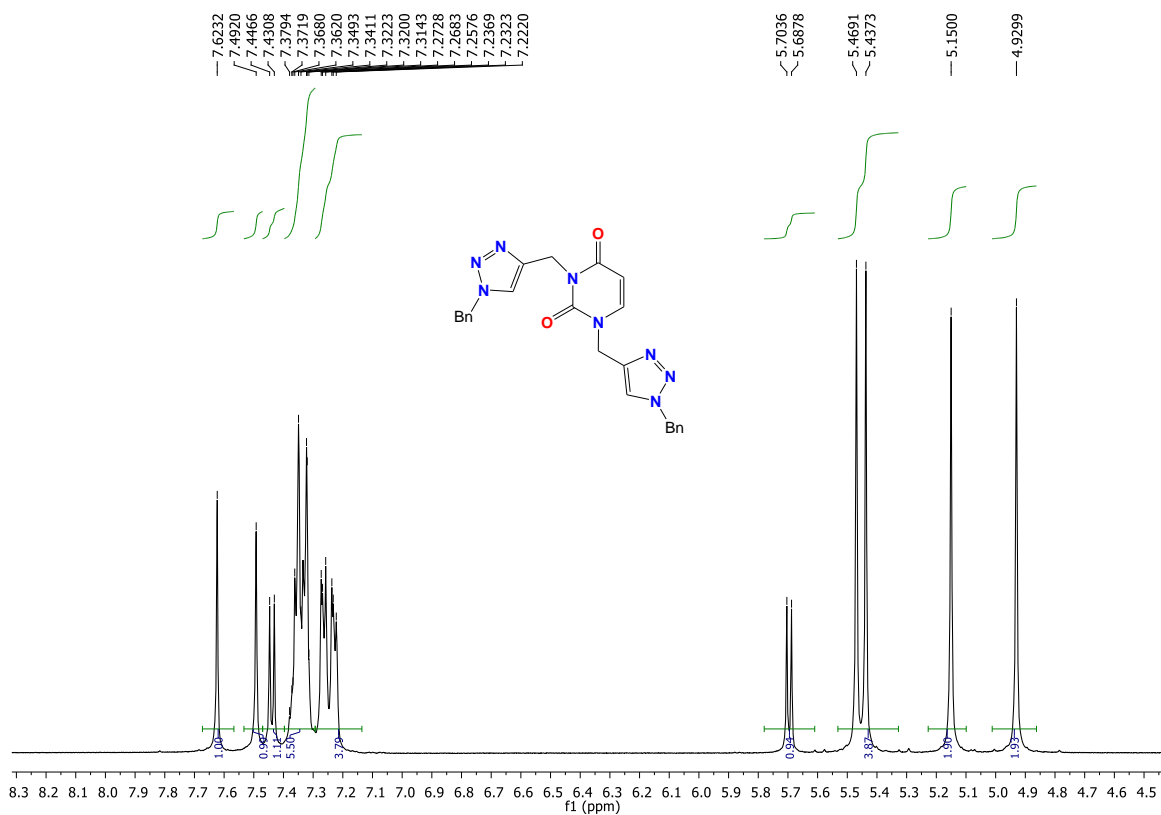

Supplement: c4dt00323c1.pdf [file c4dt00323c1.pdf]
